# Supplementary material for: Polydopamine/IR820 nanoparticles as topical phototheranostics for inhibiting psoriasiform lesions through dual photothermal and photodynamic treatments
Source: Royal Society of Chemistry journal article supplement (doi:10.1039/d2bm00835a), 2022-01-01

# Suppl. Fig. 1 (Chemical structure of polymerization reaction)

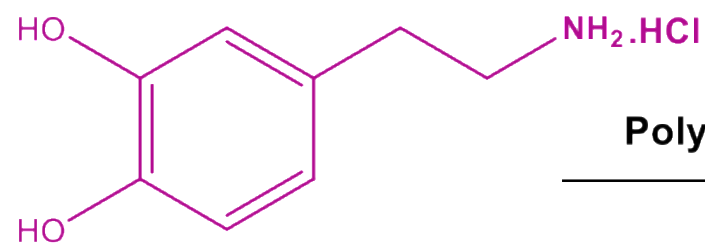

**Dopamine hydrochloride**

Polymerization

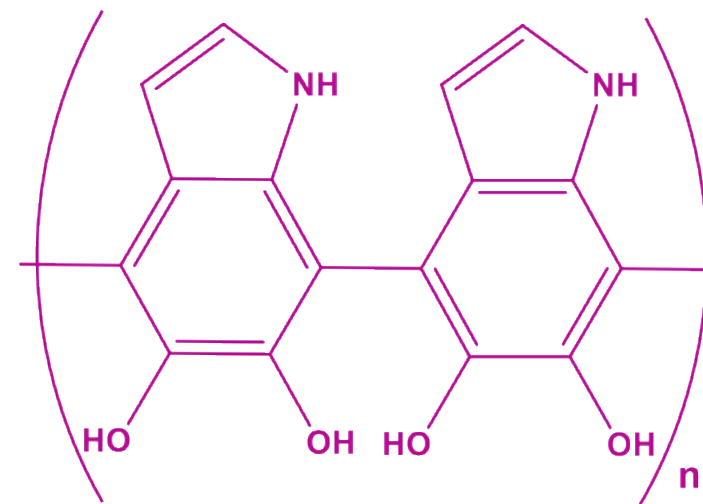

**Polydopamine**

**Suppl. Fig 2 (TEM image, PDA/IR820)**

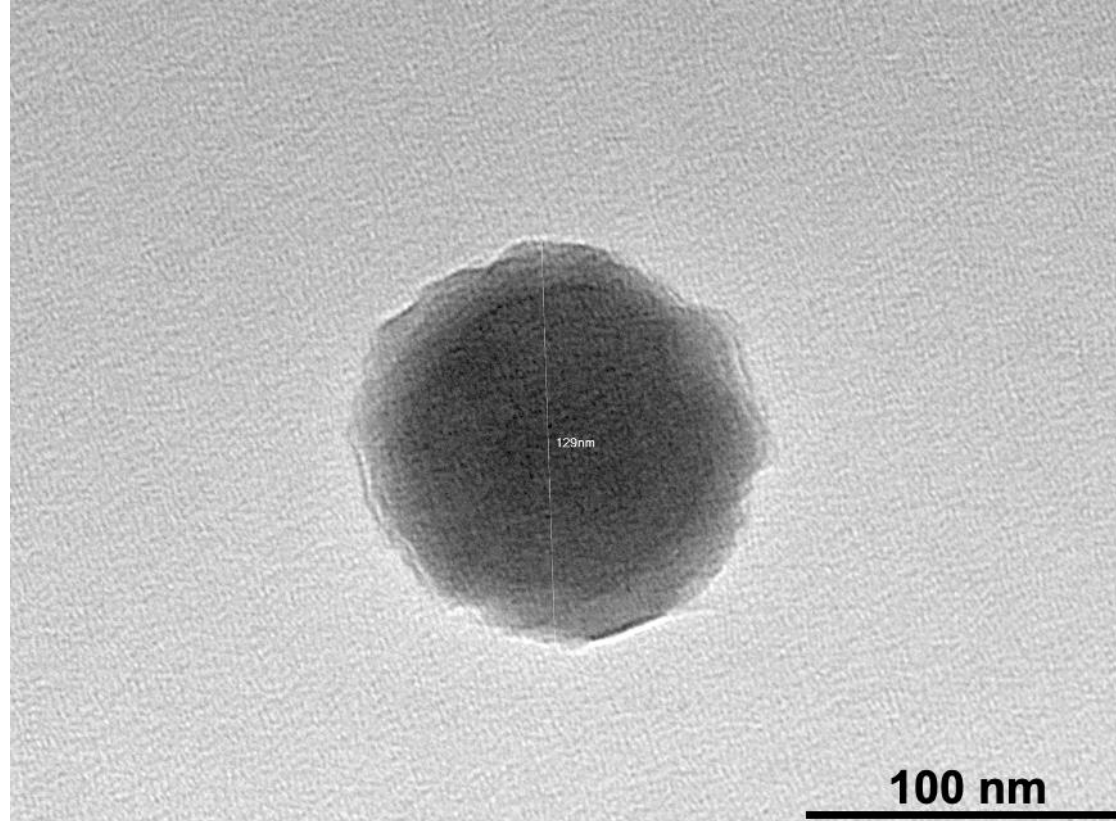

**Suppl. Fig 3 ( The determination of size and zeta potential of the nanoparticles at room temperature for 7 days)**

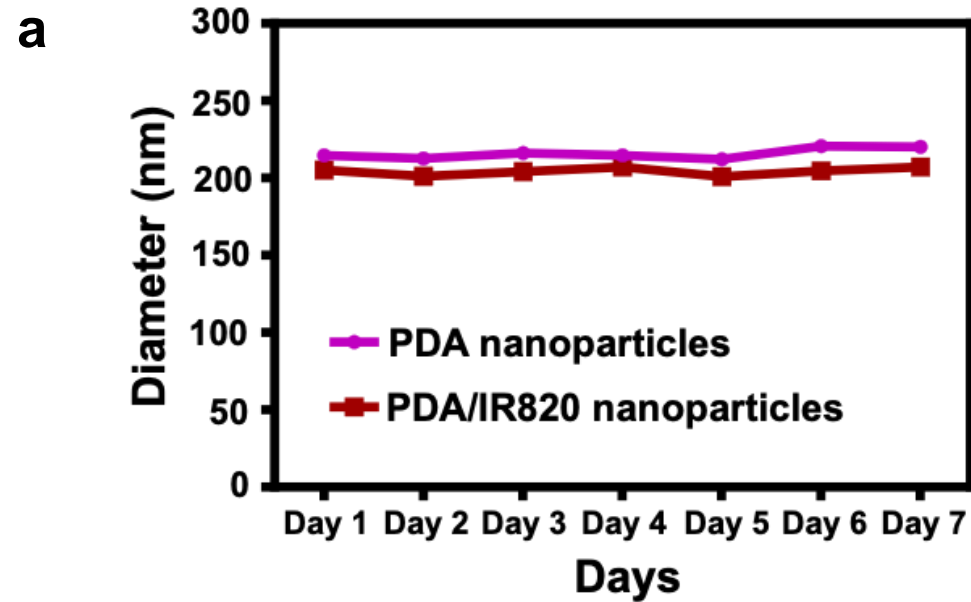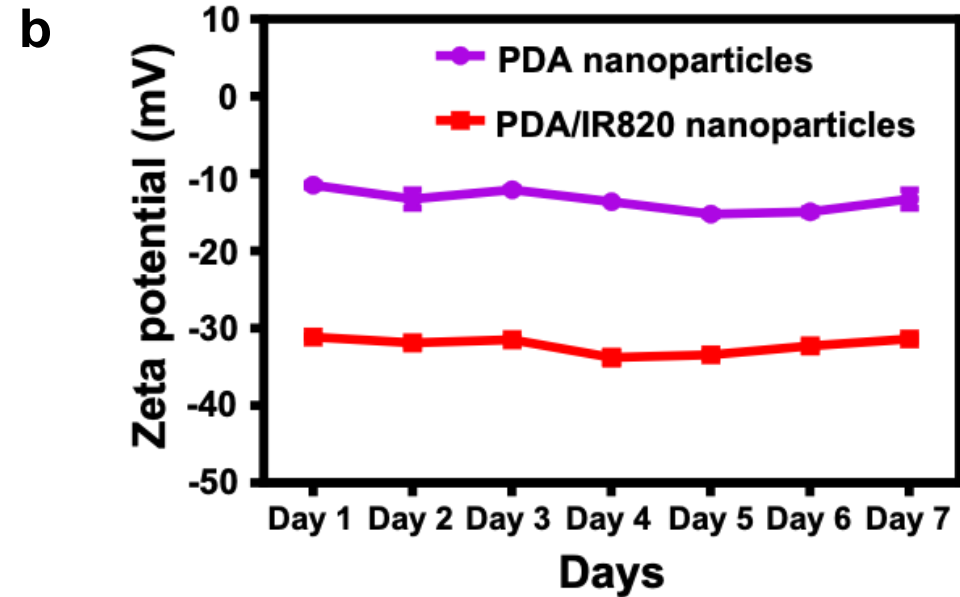

# Suppl. Fig 4 ( The reduction of temperature after the NIR off)

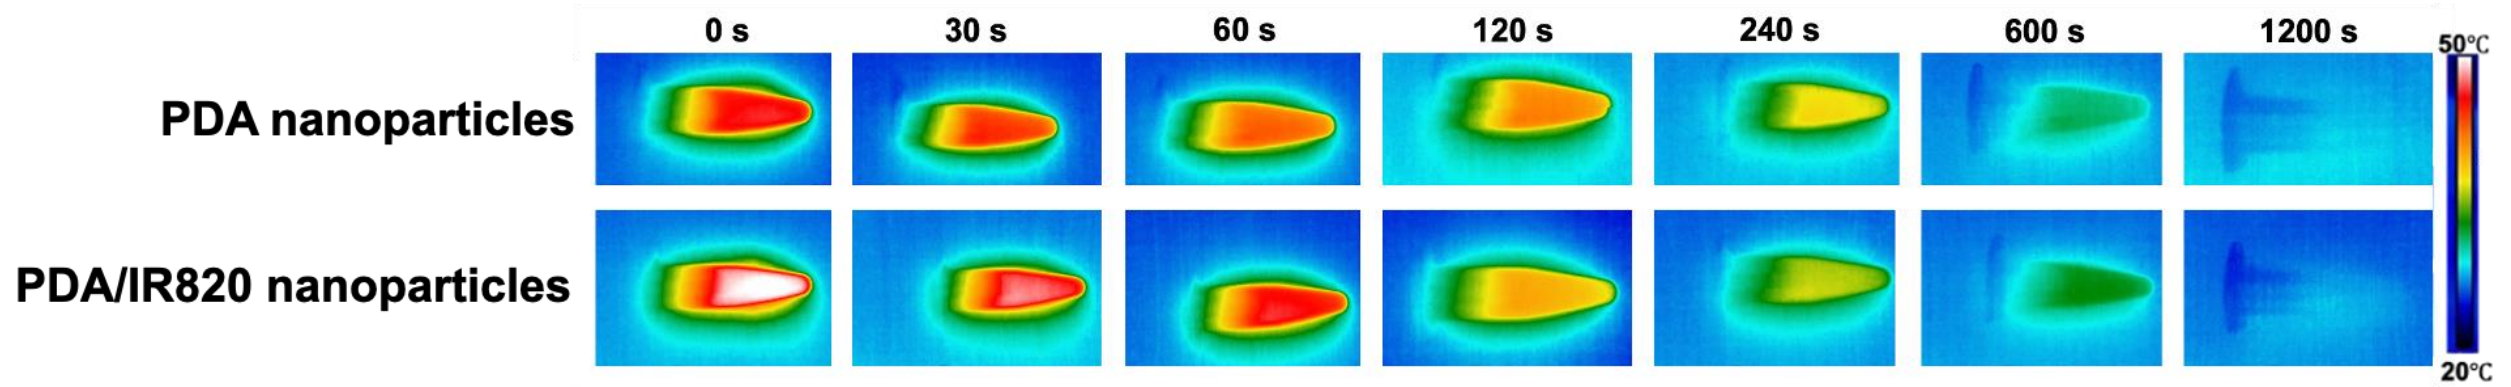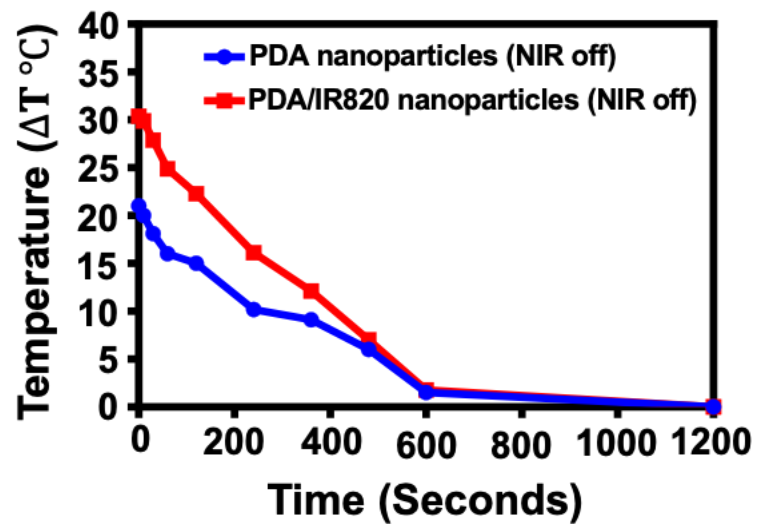

Suppl. Fig 5 (Temperature increase with respect to concentration)

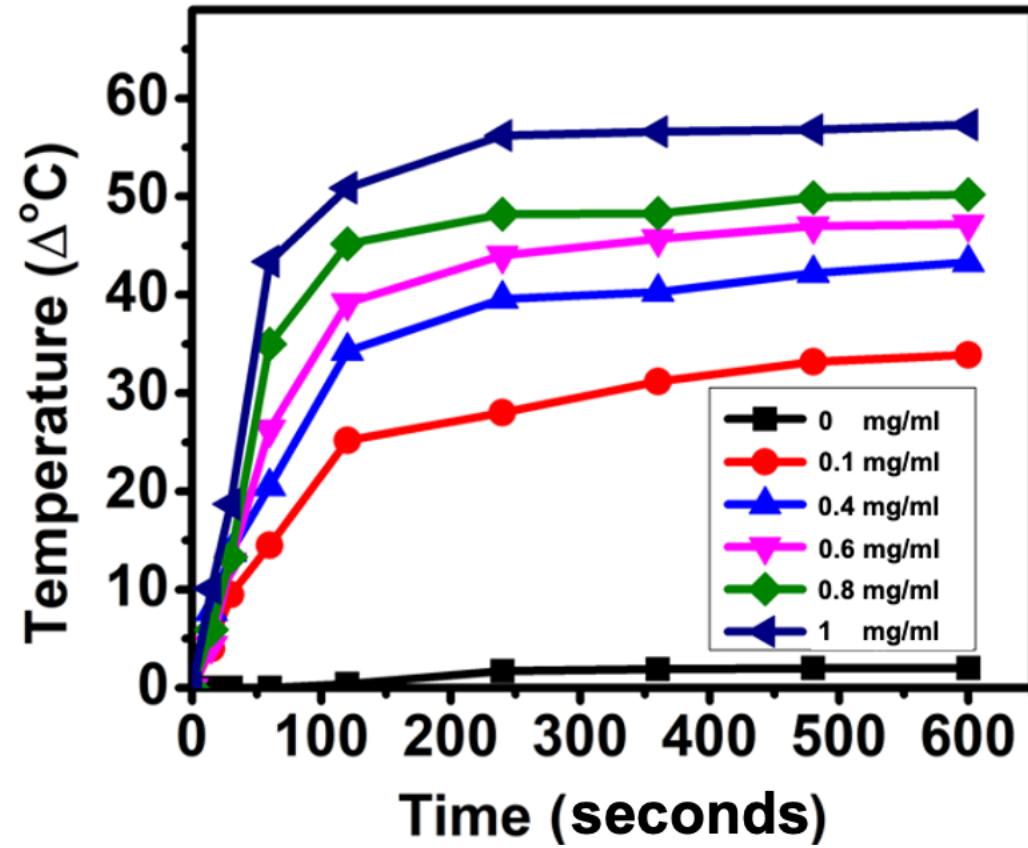

Suppl. Fig 6 (Temperature increase with respect to power)

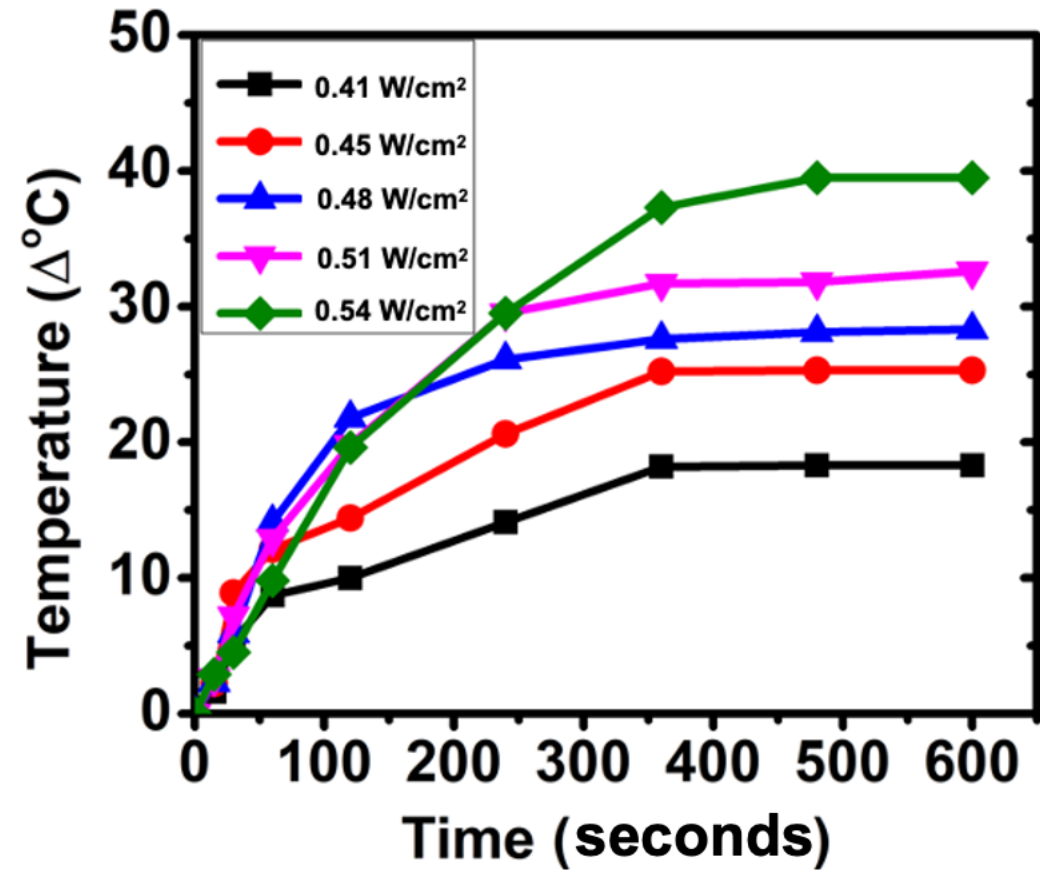

# Suppl. Fig 7 (In vitro photodynamic study, Flow cytometry)

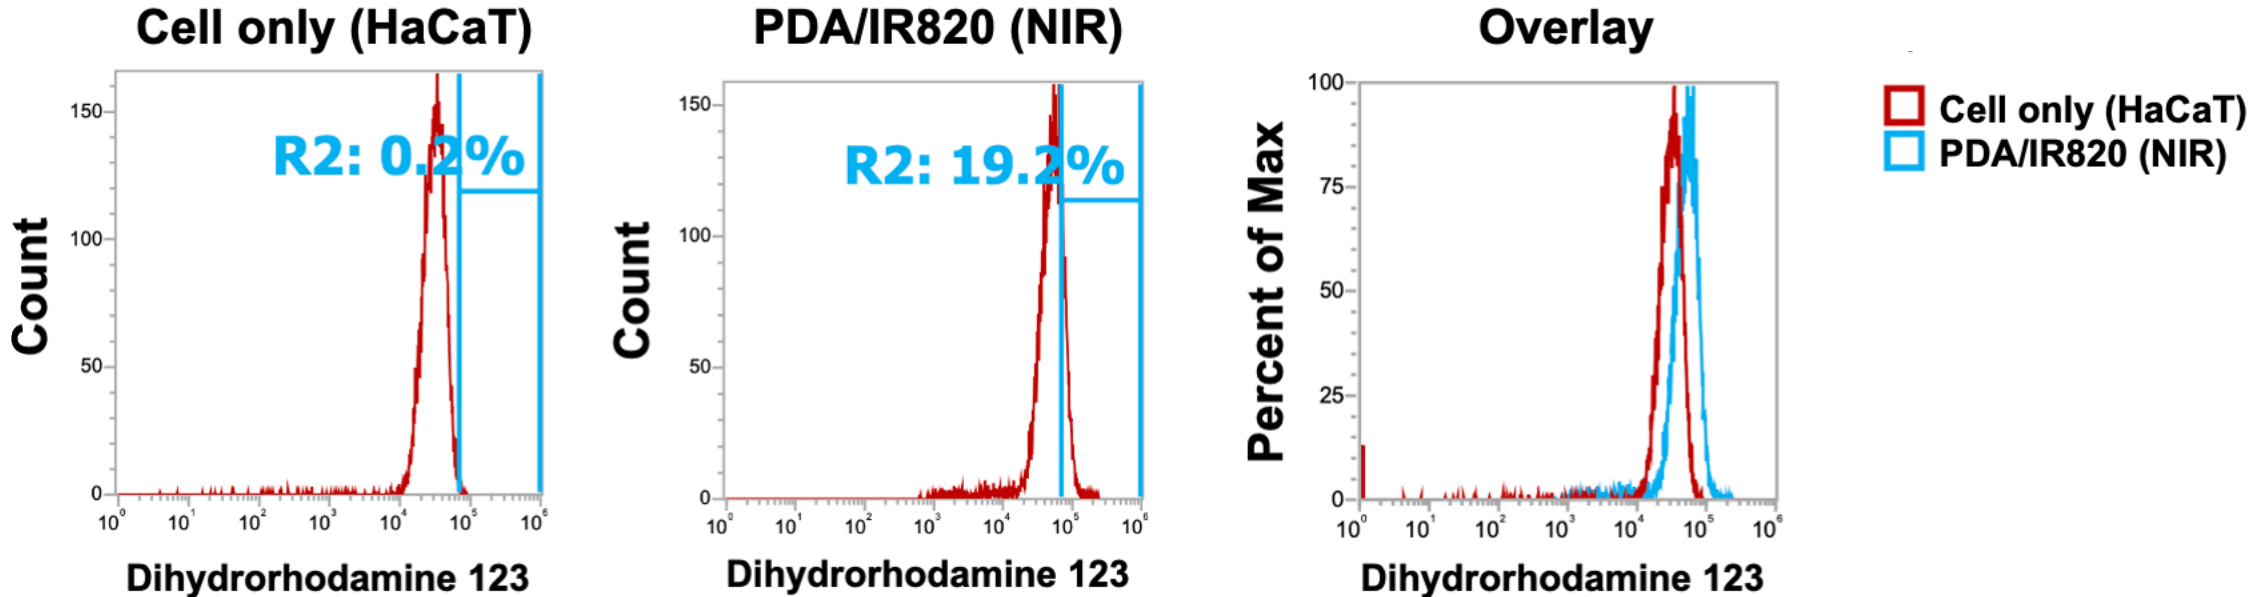

**Suppl. Fig 8 ( The H&E- stained psoriasiform skin section treated with PDA or IR820 alone with or without NIR)**

**PDA (IMQ)**

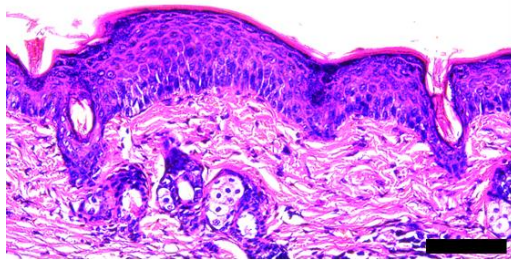

**IR820 (IMQ)**

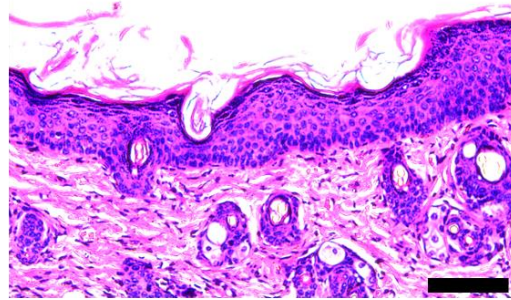

**IR820 NIR (IMQ)**

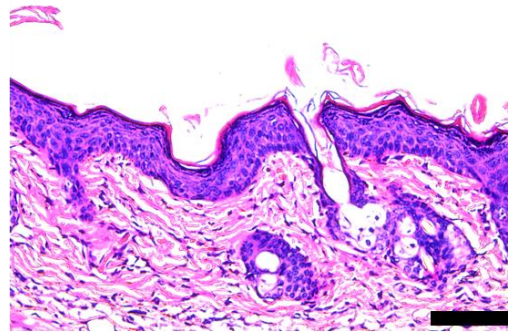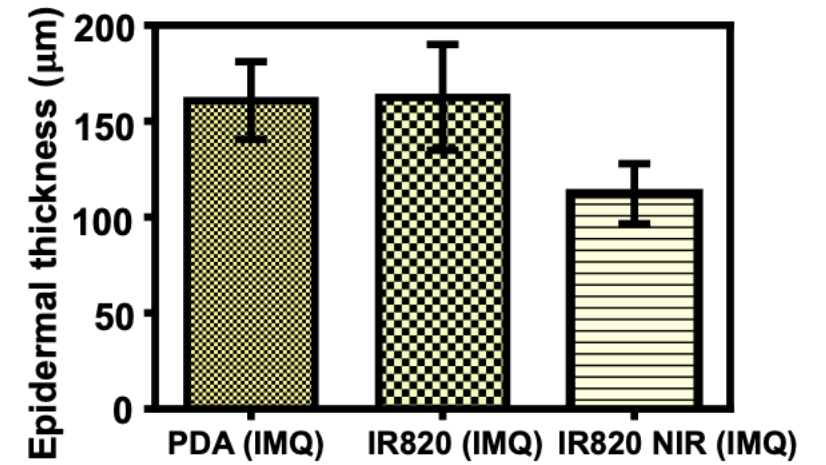



**Suppl. Fig 9 (The immunohistochemistry of the mouse skin stained with caspase 9, caspase 3, or PARP antibody)**

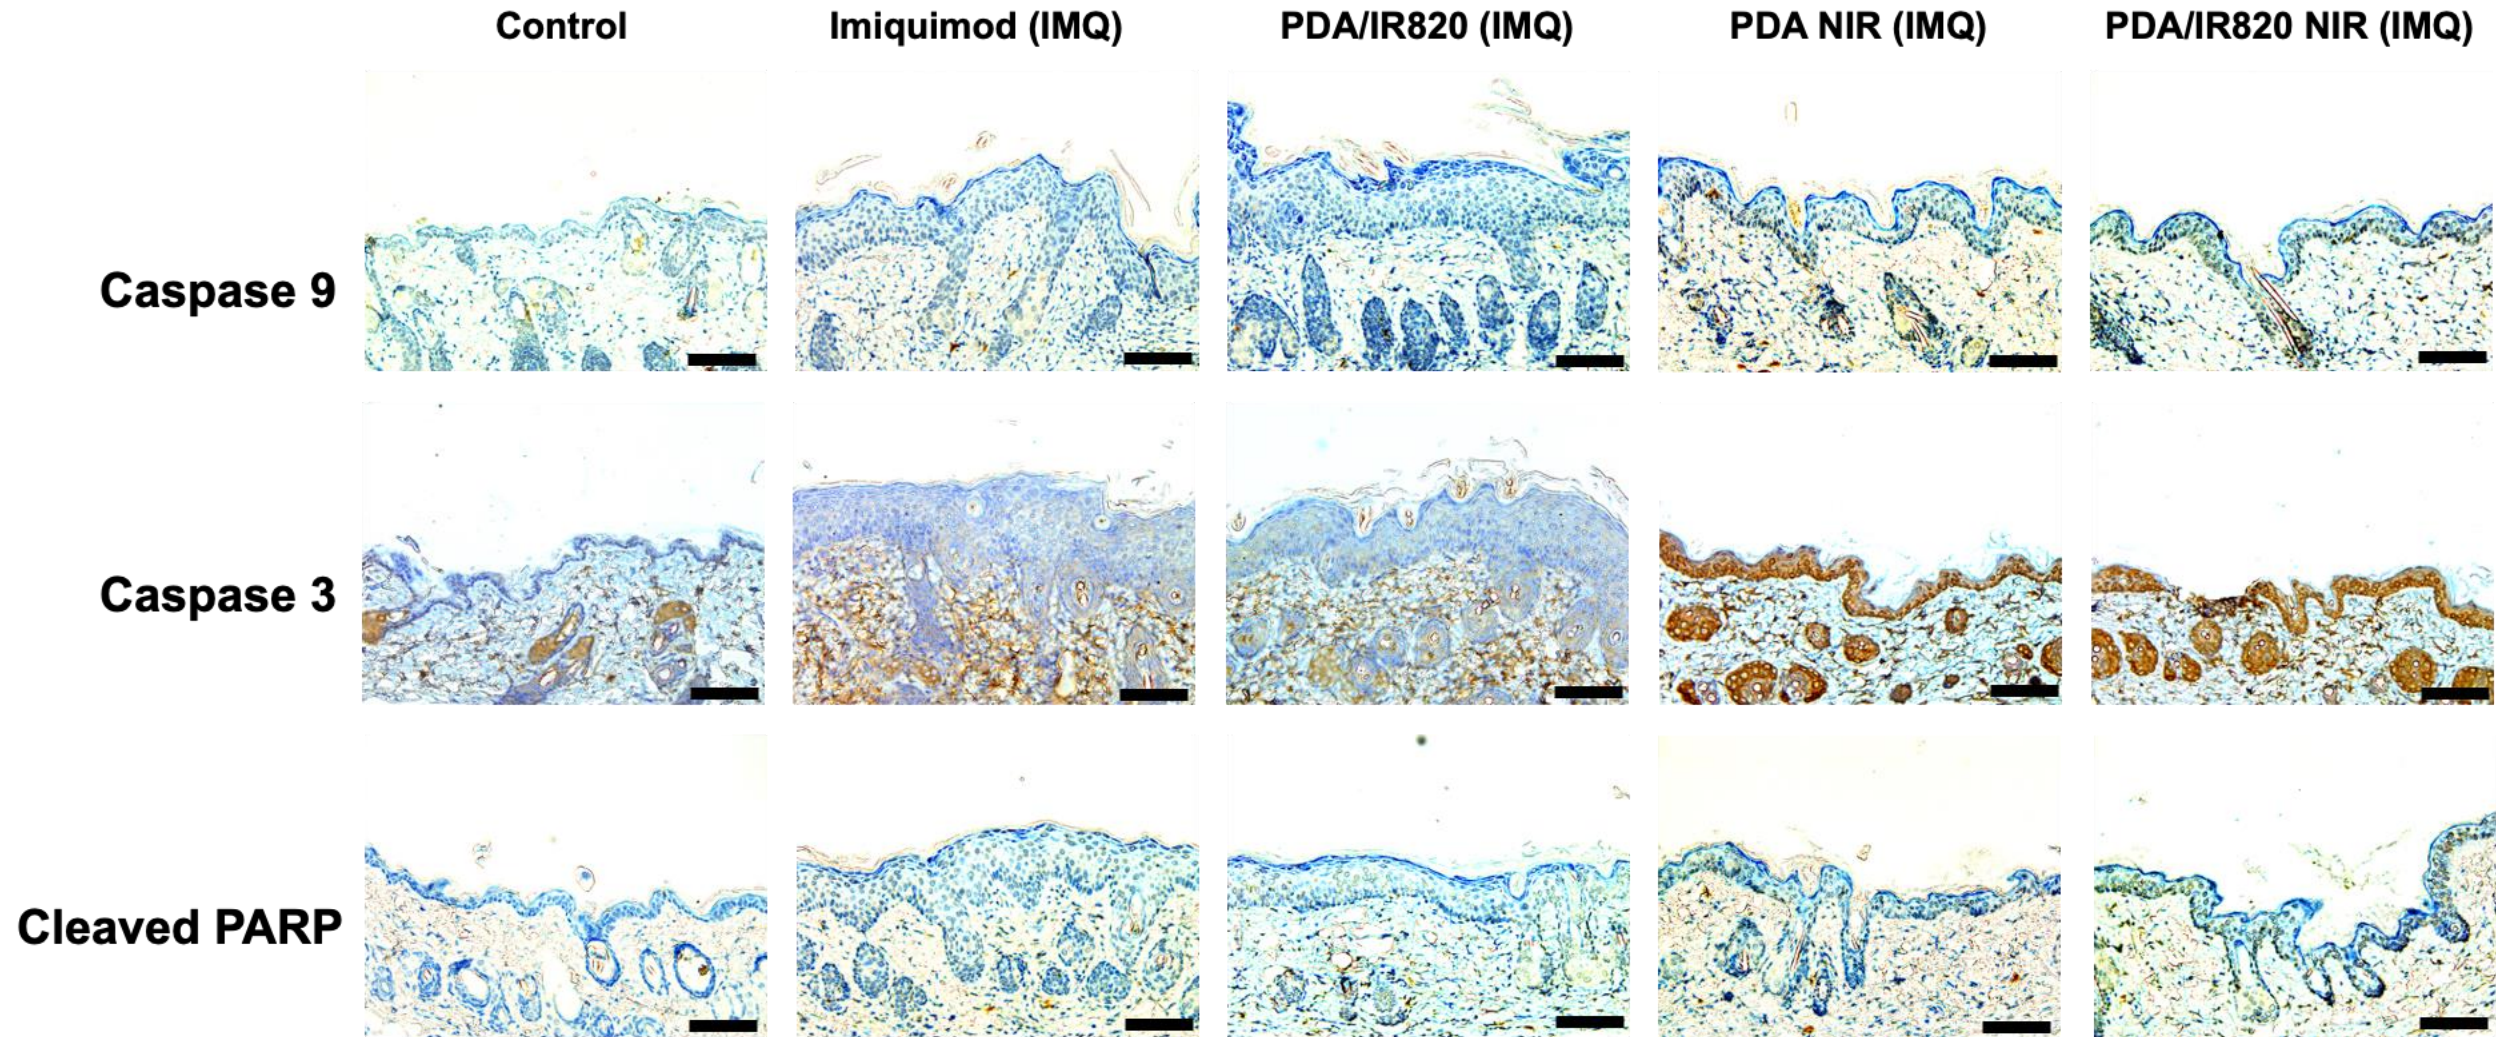

Suppl. Fig 10 (In vivo NIR off)

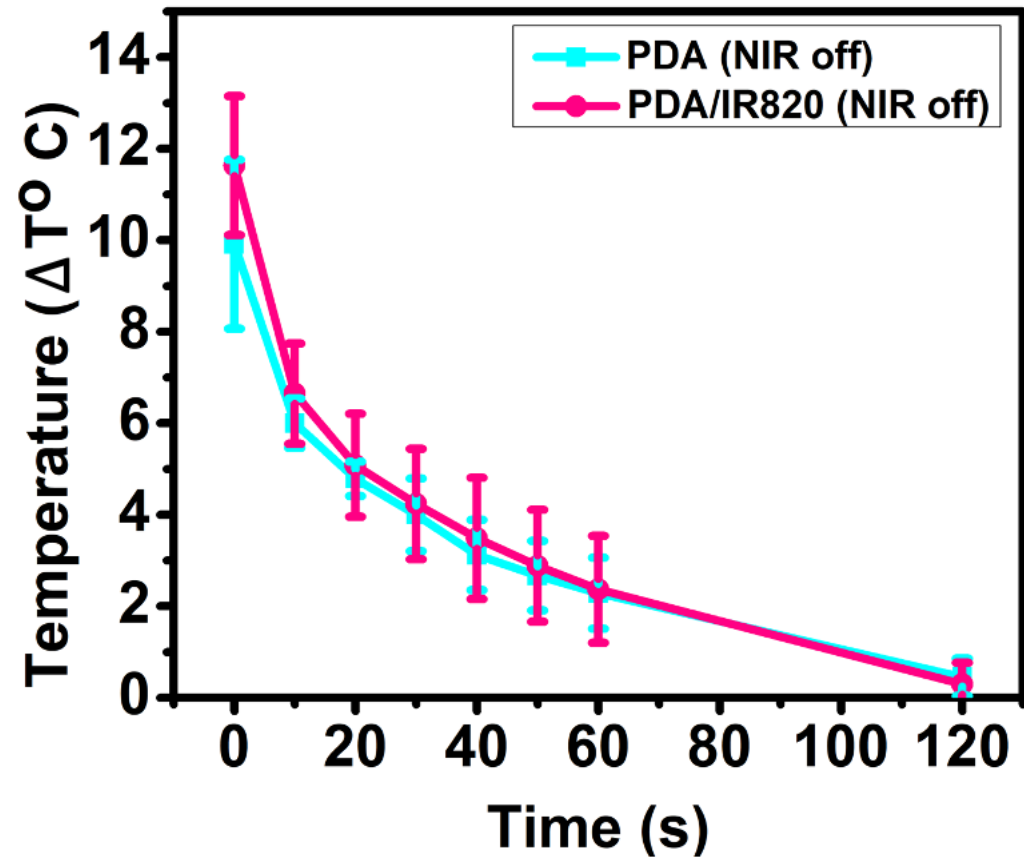

# Suppl. Fig 11 (In vivo skin irritation<sup>a</sup> test)

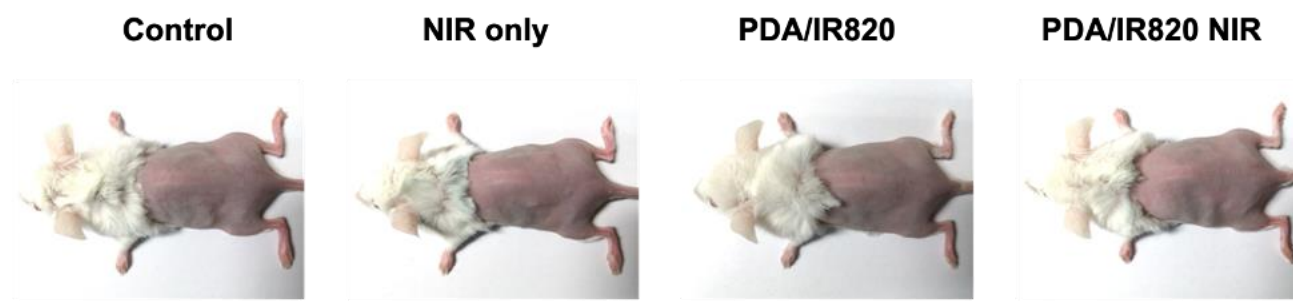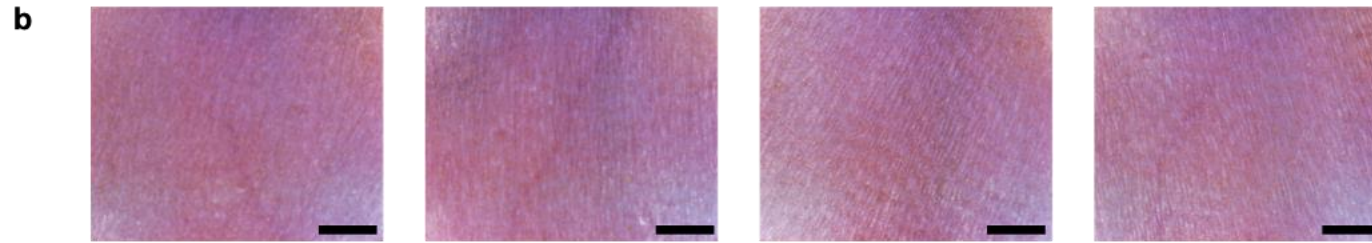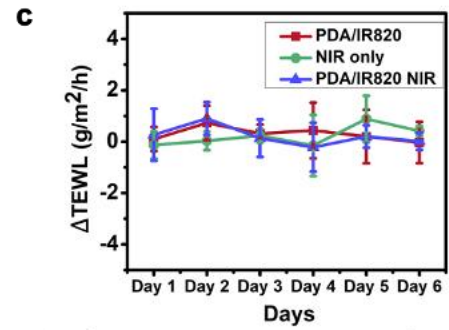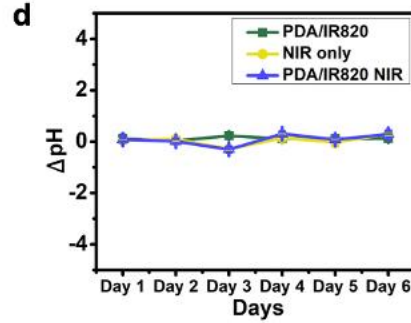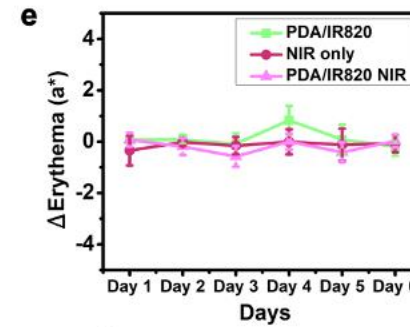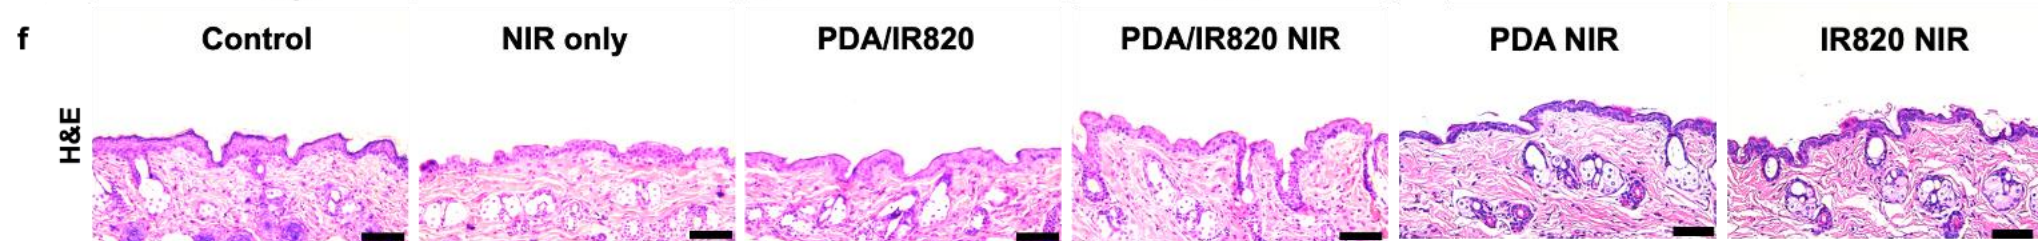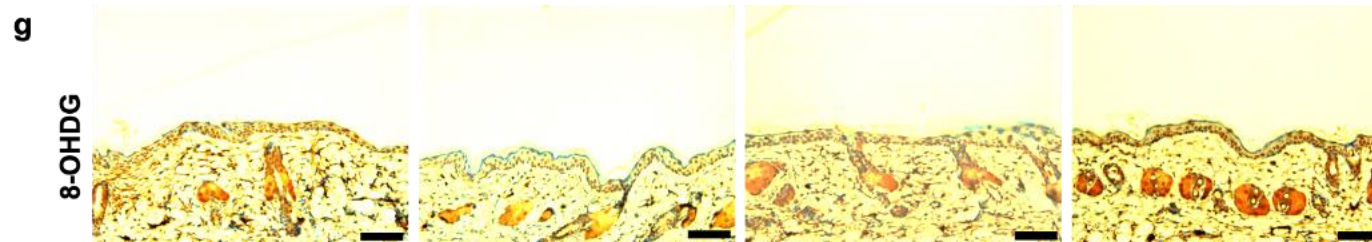

Supplement: d2bm00835a1.pdf [file d2bm00835a1.pdf]
